# Supplementary material for: Behavior-Based Quality Discrimination
Source: Atypon-hosted journal article supplement (doi:10.1287/msom.2019.0847), 2020-03-23
Supplement: msom.2019.0847.sm1.pdf [file msom.2019.0847.sm1.pdf]

## Technical Appendix

### Proof of Proposition 1

Given that two firms are symmetric, we conduct the comparative statics from firm A's perspective. When firms adopt quality discrimination, second-period equilibrium quality levels are:

$$q_{ao}^* = \frac{12\gamma - 1}{12\gamma(9\gamma - 1)} \quad (\text{A1})$$

$$q_{an}^* = \frac{6\gamma - 1}{12\gamma(9\gamma - 1)} \quad (\text{A2})$$

It follows that  $q_{ao}^* - q_{an}^* = \frac{1}{2(9\gamma - 1)} > 0$  for  $\gamma > \frac{1}{9}$ , the region that we consider. Therefore, firms reward repeat customers on the quality dimension. Second-period equilibrium prices are:

$$p_{ao}^* = \frac{12\gamma - 1}{2(9\gamma - 1)} \quad (\text{A3})$$

$$p_{an}^* = \frac{6\gamma - 1}{2(9\gamma - 1)} \quad (\text{A4})$$

We can obtain that  $p_{ao}^* - p_{an}^* = \frac{3\gamma}{9\gamma - 1} > 0$  for  $\gamma > \frac{1}{9}$ . Therefore, firms reward new customers on the price dimension. The second-period equilibrium profits are

$$\Pi_{a2}^* = \Pi_{b2}^* = \frac{(18\gamma - 1)(90\gamma^2 - 18\gamma + 1)}{72\gamma(9\gamma - 1)^2} \quad (\text{A5})$$

From the benchmark model, we know that firm's second-period profits without quality discrimination is  $\frac{1}{4}$ .

$$\Pi_{a2}^* - \frac{1}{4} = \frac{162\gamma^3 - 90\gamma^2 + 18\gamma - 1}{72\gamma(9\gamma - 1)^2} \quad (\text{A6})$$

which is greater than zero. Therefore, quality discrimination increases firm's second-period profit.

### Proof of Proposition 2

The benchmark model shows that without quality discrimination, firm's first-period prices are  $\frac{4}{3}$ . When firms adopt quality discrimination, first-period prices are

$$p_{a1}^* = \frac{(12\gamma - 1)(6\gamma - 1)}{6\gamma(9\gamma - 1)} \quad (\text{A7})$$

$$p_{a1}^* - \frac{4}{3} = -\frac{10\gamma - 1}{6\gamma(9\gamma - 1)} \quad (\text{A8})$$

which is less than zero for  $\gamma > \frac{1}{9}$ . Given that firms' first-period demand is  $\frac{1}{2}$  with or without quality discrimination, lower first-period prices with quality discrimination lead to lower first-period profits.

### Proof of Proposition 3

Let superscript  $PP$  and  $CC$  indicate the models with BBP only and with quality discrimination. We compare firms' total profits over two periods, consumer surplus, and social welfare between these two cases.

$$\begin{aligned} \Pi_{at}^{*CC} - \Pi_{at}^{*PP} &= \frac{5508\gamma^3 - 1818\gamma^2 + 198\gamma - 7}{72\gamma(9\gamma - 1)^2} - \frac{11}{12} \\ &= \frac{162\gamma^3 - 630\gamma^2 + 132\gamma - 7}{72\gamma(9\gamma - 1)^2} < 0 \end{aligned} \quad (\text{A9})$$

for  $\gamma > \frac{1}{9}$ . Therefore, quality discrimination decreases firm's total profits over two periods.

$$\begin{aligned} CS_{at}^{*CC} &= 2 \int_0^{\theta_a^*} (v - \theta - p_{a1}^* + v + q_{a2}^* - \theta - p_{ao}^*) d\theta + 2 \int_{\theta_a^*}^{\theta_1^*} (v - \theta - p_{a1}^* + v + q_{b2}^* - 1 + \theta - p_{bn}^*) d\theta \\ &= 2v - \frac{41}{18} \end{aligned} \quad (\text{A10})$$

$$\begin{aligned} CS_{at}^{*PP} &= 2 \int_0^{\theta_a^*} (v - \theta - p_{a1}^* + v + q_{ao}^* - \theta - p_{ao}^*) d\theta + 2 \int_{\theta_a^*}^{\theta_1^*} (v - \theta - p_{a1}^* + v + q_{bn}^* - 1 + \theta - p_{bn}^*) d\theta \\ &= \frac{1296\gamma^3 v - 1584\gamma^3 - 288\gamma^2 v + 528\gamma^2 + 16\gamma v - 57\gamma + 2}{8\gamma(9\gamma - 1)^2} \end{aligned} \quad (\text{A11})$$

$$CS_{at}^{*CC} - CS_{at}^{*PP} = -\frac{972\gamma^3 - 1800\gamma^2 + 349\gamma - 18}{72\gamma(9\gamma - 1)^2} > 0 \quad (\text{A12})$$

for  $\gamma > \frac{1}{9}$ . Therefore, quality discrimination increases consumer surplus.

$$SW_{at}^{*CC} = CS_{at}^{*CC} + \Pi_{at}^{*CC} = 2v - \frac{4}{9} \quad (\text{A13})$$

$$\begin{aligned} SW_{at}^{*PP} &= CS_{at}^{*PP} + \Pi_{at}^{*PP} \\ &= \frac{11664\gamma^3 v - 3240\gamma^3 - 2592\gamma^2 v + 1116\gamma^2 + 144\gamma v - 117\gamma + 4}{72\gamma(9\gamma - 1)^2} \end{aligned} \quad (\text{A14})$$

$$SW_{at}^{*CC} - SW_{at}^{*PP} = -\frac{648\gamma^3 - 540\gamma^2 + 85\gamma - 4}{72\gamma(9\gamma - 1)^2} > 0 \quad (\text{A15})$$

if and only if  $\gamma < 0.65$ . Therefore, quality discrimination increases social welfare if and only if  $\gamma < 0.65$ .

### Proof of Proposition 4

Let superscript  $PP$  and  $CC$  indicate the models with BBP only and with quality discrimination and superscript  $CP$  indicate the asymmetric case in which only firm A uses quality discrimination. We compare firms' second-period profits in these cases because firms decide whether to invest in quality discrimination at the beginning of the second period.

$$\begin{aligned}\Pi_{a2}^{*CP} - \Pi_{a2}^{*PP} &= \frac{14580\gamma^4 - 7776\gamma^3 + 1377\gamma^2 - 90\gamma + 2}{81\gamma(18\gamma - 1)(6\gamma - 1)^2} - \frac{1}{4} \\ &= \frac{5832\gamma^4 - 10692\gamma^3 + 3078\gamma^2 - 279\gamma + 8}{324\gamma(18\gamma - 1)(6\gamma - 1)^2}\end{aligned}\quad (\text{A16})$$

which is positive if  $\gamma < 0.19$ .

$$\begin{aligned}\Pi_{b2}^{*CC} - \Pi_{b2}^{*CP} &= \frac{(18\gamma - 1)(90\gamma^2 - 18\gamma + 1)}{72\gamma(9\gamma - 1)^2} - \frac{262440\gamma^5 - 113724\gamma^4 + 18954\gamma^3 - 1539\gamma^2 + 63\gamma - 1}{81\gamma(18\gamma - 1)(6\gamma - 1)^2} \\ &= \frac{7558272\gamma^6 - 3884112\gamma^5 + 798984\gamma^4 - 82620\gamma^3 + 4374\gamma^2 - 108\gamma + 1}{648\gamma(18\gamma - 1)^2(6\gamma - 1)^2(9\gamma - 1)^2}\end{aligned}\quad (\text{A17})$$

which is positive if  $\gamma < 0.15$ . Therefore for  $\gamma < 0.15$ ,  $\Pi_{a2}^{*CP} > \Pi_{a2}^{*PP}$  and  $\Pi_{b2}^{*CC} > \Pi_{b2}^{*CP}$ , which leads both firms to use quality discrimination in equilibrium. If  $\gamma \in (0.15, 0.19)$ ,  $\Pi_{a2}^{*CP} > \Pi_{a2}^{*PP}$  but  $\Pi_{b2}^{*CC} < \Pi_{b2}^{*CP}$ . In this case, the asymmetric equilibrium in which one firm uses quality discrimination and the other firm doesn't arises. If  $\gamma > 0.19$ ,  $\Pi_{a2}^{*CP} < \Pi_{a2}^{*PP}$  and  $\Pi_{b2}^{*CC} < \Pi_{b2}^{*CP}$ , both firms do not use quality discrimination.

### Proof of Proposition 5

Let  $\gamma_o$  and  $\gamma_n$  indicate the cost of quality provision for repeat and new customers, respectively and  $\delta = \frac{\gamma_o}{\gamma_n} > 0$  represent the cost efficiency of serving repeat customers relative to new customers. Then  $\gamma_o = \delta\gamma_n$ . We solve the main model as follows.

The second-period marginal consumers are located at  $\theta_a$  and  $\theta_b$  which take the same forms as in the main model.

$$v - \theta_a + q_{ao} - p_{ao} = v - (1 - \theta_a) + q_{bn} - p_{bn}, \quad (\text{A18})$$

$$\theta_a = \frac{1}{2} + \frac{q_{ao} - q_{bn}}{2} - \frac{p_{ao} - p_{bn}}{2}. \quad (\text{A19})$$

and

$$v - \theta_b + q_{an} - p_{an} = v - (1 - \theta_b) + q_{bo} - p_{bo}, \quad (\text{A20})$$

$$\theta_b = \frac{1}{2} + \frac{q_{an} - q_{bo}}{2} - \frac{p_{an} - p_{bo}}{2}. \quad (\text{A21})$$

Firms' profit functions in the second period are

$$\Pi_{a2} = p_{ao}\theta_a + p_{an}(\theta_b - \theta_1) - \gamma_o q_{ao}^2 - \gamma_n q_{an}^2, \quad (\text{A22})$$

$$\Pi_{b2} = p_{bo}(1 - \theta_b) + p_{bn}(\theta_1 - \theta_a) - \gamma_o q_{bo}^2 - \gamma_n q_{bn}^2. \quad (\text{A23})$$

We solve for second-period prices and obtain  $p_{ao}^* = \frac{q_{ao} - q_{bn}}{3} + \frac{2\theta_1}{3} + \frac{1}{3}$ ,  $p_{an}^* = \frac{q_{an} - q_{bo}}{3} - \frac{4\theta_1}{3} + 1$ ,  $p_{bo}^* = \frac{q_{bo} - q_{an}}{3} - \frac{2\theta_1}{3} + 1$ , and  $p_{bn}^* = \frac{q_{bn} - q_{ao}}{3} + \frac{4\theta_1}{3} - \frac{1}{3}$ . Then, we solve for the second-period quality and obtain  $q_{an}^* = \frac{\theta_1 - 1 + 9\delta\gamma_n - 12\delta\gamma_n\theta_1}{3\gamma_n(18\delta\gamma_n - \delta - 1)}$ ,  $q_{ao}^* = \frac{6\gamma_n\theta_1 + 3\gamma_n - \theta_1}{3\gamma_n(18\delta\gamma_n - \delta - 1)}$ ,  $q_{bn}^* = \frac{12\delta\gamma_n\theta_1 - 3\delta\gamma_n - \theta_1}{3\gamma_n(18\delta\gamma_n - \delta - 1)}$ , and  $q_{bo}^* = \frac{\theta_1 - 1 + 9\gamma_n - 6\gamma_n\theta_1}{3\gamma_n(18\delta\gamma_n - \delta - 1)}$ . The first-period consumer is located at  $\theta_1$ . We must have that

$$v - \theta_1 - p_{a1} + [v - (1 - \theta_1) + q_{bn}^{e*} - p_{bn}^{e*}] = v - (1 - \theta_1) - p_{b1} + [v - \theta_1 + q_{an}^{e*} - p_{an}^{e*}]. \quad (\text{A24})$$

We obtain

$$\theta_1 = \frac{1 - 6\gamma_n + 3\gamma_n(p_{a1} - p_{b1}) - 12\delta\gamma_n + 72\delta\gamma_n^2 + 3\delta\gamma_n(p_{a1} - p_{b1}) - 54\delta\gamma_n^2(p_{a1} - p_{b1})}{2(1 - 6\gamma_n + 72\delta\gamma_n^2 - 12\delta\gamma_n)} \quad (\text{A25})$$

Firms' profit functions to maximize in the first period are:

$$\Pi_{at} = p_{a1}\theta_1 + \Pi_{a2}^*, \quad (\text{A26})$$

$$\Pi_{bt} = p_{b1}(1 - \theta_1) + \Pi_{b2}^*. \quad (\text{A27})$$

We obtain first-period prices:

$$p_{a1}^* = p_{b1}^* = \frac{2(1944\delta^2\gamma_n^3 - 306\delta^2\gamma_n^2 + 9\delta^2\gamma_n - 396\delta\gamma_n^2 + 54\delta\gamma_n - \delta + 18\gamma_n - 2)}{9\gamma_n(18\delta\gamma_n - \delta - 1)^2} \quad (\text{A28})$$

In equilibrium, firms' second-period profits are

$$\Pi_{a2}^* = \Pi_{b2}^* = \frac{3240\delta^2\gamma_n^3 - 468\delta^2\gamma_n^2 + 18\delta^2\gamma_n - 360\delta\gamma_n^2 + 36\delta\gamma_n - \delta + 18\gamma_n - 1}{36\gamma_n(18\delta\gamma_n - \delta - 1)^2} \quad (\text{A29})$$

firms' total profits over two periods are

$$\Pi_{at}^* = \Pi_{bt}^* = \frac{11016\delta^2\gamma_n^3 - 1692\delta^2\gamma_n^2 + 54\delta^2\gamma_n - 1944\delta\gamma_n^2 + 252\delta\gamma_n - 5\delta + 90\gamma_n - 9}{36\gamma_n(18\delta\gamma_n - \delta - 1)^2} \quad (\text{A30})$$

The impact of  $\delta$  on profits are as follows:

$$\frac{\partial \Pi_{a2}^*}{\partial \delta} = -\frac{(12\gamma_n - 1)(6\delta\gamma_n - \delta + 24\gamma_n - 1)}{36\gamma_n(18\delta\gamma_n - \delta - 1)^3} < 0 \quad (\text{A31})$$

$$\frac{\partial \Pi_{at}^*}{\partial \delta} = \frac{12960\delta\gamma_n^3 - 3096\delta\gamma_n^2 + 234\delta\gamma_n - 1296\gamma_n^2 - 5\delta + 252\gamma_n - 13}{36\gamma_n(18\delta\gamma_n - \delta - 1)^3} > 0 \quad (\text{A32})$$

in the region of parameters that we consider. Since total profits increase with  $\delta$  but second-period profits decrease with  $\delta$ , it follows that first-period profits increase with  $\delta$ .

## A1 Firm and Consumer Patience

Let  $\delta_f$  and  $\delta_c$  represent the discounting factor of the firms and consumers. We analyze the benchmark model with BBP and main model with quality discrimination. When firms and consumers discount the second-period outcome, the second-period equilibrium stay the same as without discounting. Thus, we focus on analyzing the first-period decisions.

### A1.1 Benchmark Model

The first-period marginal consumer is located at  $\theta_1$ . With consumer discounting, we have

$$\begin{aligned} v - \theta_1 - p_{a1} + \delta_c [v - (1 - \theta_1) + q_{b2}^{e*} - p_{bn}^{e*}] &= \\ v - (1 - \theta_1) - p_{b1} + \delta_c [v - \theta_1 + q_{a2}^{e*} - p_{an}^{e*}] &= \\ \theta_1 &= \frac{1}{2} - \frac{7(p_{a1} - p_{b1})}{2(7 + 2\delta_c)} \end{aligned} \quad (\text{A33})$$

The total profits that firms maximize in the first period are

$$\Pi_{at} = p_{a1}\theta_1 + \Pi_{a2}^*, \quad (\text{A34})$$

$$\Pi_{bt} = p_{b1}(1 - \theta_1) + \Pi_{b2}^*. \quad (\text{A35})$$

We solve for the first-period equilibrium prices and quality and obtain  $p_{a1}^* = p_{b1}^* = 1 + \frac{2\delta_c}{7} + \frac{\delta_f}{21}$ .

### A1.2 Main Model

Again, the second-period analysis is the same as in the main model because firm and consumer discounting does not affect the second-period decisions. The first-period marginal consumer at  $\theta_1$  is solved as follows:

$$\begin{aligned} v - \theta_1 + q_{a1} - p_{a1} + \delta_c [v - (1 - \theta_1) + q_{bn}^{e*} - p_{bn}^{e*}] &= v - (1 - \theta_1) + q_{b1} - p_{b1} + \delta_c [v - \theta_1 + q_{an}^{e*} - p_{an}^{e*}], \\ \theta_1 &= \frac{1}{2} - \frac{3[3\delta_c(q_{a1} - q_{b1}) + 7(p_{a1} - p_{b1} + q_{b1} - q_{a1})]}{21 - \delta_c} \end{aligned} \quad (\text{A36})$$

Firms set first-period quality and prices to maximize the following profit functions:

$$\Pi_{at} = p_{a1}\theta_1 + \Pi_{a2}^* - q_{a1}^2, \quad (\text{A37})$$

$$\Pi_{bt} = p_{b1}(1 - \theta_1) + \Pi_{b2}^* - q_{b1}^2. \quad (\text{A38})$$

First-period equilibrium quality levels are  $q_{a1}^* = q_{b1}^* = \frac{9261 + 189\delta_c^2 + 1656\delta_c\delta_f - 7424\delta_f^2 - 4410\delta_c + 4200\delta_f}{42(1323 - 63\delta_c - 928\delta_f)}$ .

### A1.3 Verification of Main Results

With firm and consumer patience, proposition 1 remains the same as the second-period outcomes do not change. To see this,  $q_{ao}^{*CC} - q_{an}^{*CC} = \frac{1}{7}$ ,  $p_{ao}^{*CC} - p_{an}^{*CC} = \frac{3}{7}$ , and

$\Pi_{a2}^{*CC} - \Pi_{a2}^{*PP} = \frac{23}{1764}$ . Proposition 2 holds as  $p_{a1}^{*CC} - p_{a1}^{*PP} = -\frac{\delta_c}{3} - \frac{\delta_f}{21} < 0$  and  $\Pi_{at}^{*CC} - \Pi_{at}^{*PP} = \frac{U_1}{7056(63\delta_c+928\delta_f-1323)^2(14\delta_c-38\delta_f+49)^2} < 0$ , where  $U_1 = 244268136\delta_c^5\delta_f + 2382098985\delta_c^4\delta_f^2 - 11529899136\delta_c^3\delta_f^3 + 3807147008\delta_c^2\delta_f^4 + 39685259264\delta_c\delta_f^5 - 914838624\delta_c^5 - 27535138596\delta_c^4\delta_f - 46187599332\delta_c^3\delta_f^2 + 905390869712\delta_c^2\delta_f^3 - 1541574429696\delta_c\delta_f^4 - 106895622144\delta_f^5 + 31947782832\delta_c^4 + 191482856208\delta_c^3\delta_f - 3752254963786\delta_c^2\delta_f^2 + 7858122606432\delta_c\delta_f^3 + 440868841472\delta_f^4 - 143183135592\delta_c^3 + 5156406567900\delta_c^2\delta_f - 15993413416036\delta_c\delta_f^2 - 452079659696\delta_f^3 - 2364819724764\delta_c^2 + 14728301634816\delta_c\delta_f - 350037350551\delta_f^2 - 5126298229584\delta_c + 853188665616\delta_f - 386633673468 < 0$ .  $CS^{*CC} - CS^{*PP} = \frac{U_2}{1764(63\delta_c+928\delta_f-1323)(14\delta_c-38\delta_f+49)} > 0$ , where  $U_2 = 484659\delta_c^3\delta_f + 738528\delta_c^2\delta_f^2 + 532728\delta_c^3 + 5677805\delta_c^2\delta_f - 19901192\delta_c\delta_f^2 - 2962176\delta_f^3 - 9322740\delta_c^2 + 55604857\delta_c\delta_f + 7812168\delta_f^2 - 39155508\delta_c - 5092521\delta_f$ .  $SW^{*CC} - SW^{*PP} = \frac{U_3}{3528(63\delta_c+928\delta_f-1323)^2(14\delta_c-38\delta_f+49)^2} > 0$ , where  $U_3 = 1099206612\delta_c^5\delta_f + 13957694541\delta_c^4\delta_f^2 - 30058089600\delta_c^3\delta_f^3 - 48279755776\delta_c^2\delta_f^4 + 39685259264\delta_c\delta_f^5 + 24893568\delta_c^5 - 21189211218\delta_c^4\delta_f + 71491174244\delta_c^3\delta_f^2 + 219317898352\delta_c^2\delta_f^3 - 200769442816\delta_c\delta_f^4 + 102020726784\delta_f^5 - 871274880\delta_c^4 - 42413713020\delta_c^3\delta_f - 291898325418\delta_c^2\delta_f^2 + 313767351072\delta_c\delta_f^3 - 562934177792\delta_f^4 + 3964300704\delta_c^3 + 65020703076\delta_c^2\delta_f - 65943090444\delta_c\delta_f^2 + 1165856105456\delta_f^3 + 64038703680\delta_c^2 - 220188103632\delta_c\delta_f - 1074067015931\delta_f^2 + 134481277728\delta_c + 371380010022\delta_f > 0$  for  $\delta_c, \delta_f \in [0, 1]$ .

## A2 Switching Costs

Let  $s$  denote the switching cost. We analyze the benchmark model and main model with switching costs.

### A2.1 Benchmark Model

When firms use BBP and consumers incur switching costs, the marginal consumers in the second period become:

$$v - \theta_a + q_{a2} - p_{ao} = v - (1 - \theta_a) + q_{b2} - p_{bn} - s, \quad (\text{A39})$$

$$\theta_a = \frac{1+s}{2} + \frac{q_{a2} - q_{b2}}{2} - \frac{p_{ao} - p_{bn}}{2}. \quad (\text{A40})$$

$$v - \theta_b + q_{a2} - p_{an} - s = v - (1 - \theta_b) + q_{b2} - p_{bo}, \quad (\text{A41})$$

$$\theta_b = \frac{1-s}{2} + \frac{q_{a2} - q_{b2}}{2} - \frac{p_{an} - p_{bo}}{2}. \quad (\text{A42})$$

Firms maximize second-period profit functions:

$$\Pi_{a2} = p_{ao}\theta_a + p_{an}(\theta_b - \theta_1) - q_{a2}^2, \quad (\text{A43})$$

$$\Pi_{b2} = p_{bo}(1 - \theta_b) + p_{bn}(\theta_1 - \theta_a) - q_{b2}^2. \quad (\text{A44})$$

Second-period prices are  $p_{an}^* = \frac{3-4\theta_1-s}{3} + \frac{q_{a2}-q_{b2}}{3}$ ,  $p_{ao}^* = \frac{1+s+2\theta_1}{3} + \frac{q_{a2}-q_{b2}}{3}$ ,  $p_{bn}^* = \frac{4\theta_1-1-s}{3} + \frac{q_{b2}-q_{a2}}{3}$ , and  $p_{bo}^* = \frac{3-2\theta_1+s}{3} + \frac{q_{b2}-q_{a2}}{3}$ . Second-period quality levels are  $q_{a2}^* = \frac{5}{21} - \frac{\theta_1}{7}$  and  $q_{b2}^* = \frac{2}{21} + \frac{\theta_1}{7}$ .

The first-period marginal consumer is located at  $\theta_1$ . We have

$$\begin{aligned} v - \theta_1 - p_{a1} + [v - (1 - \theta_1) + q_{b2}^{e*} - p_{bn}^{e*} - s] &= v - (1 - \theta_1) - p_{b1} + [v - \theta_1 + q_{a2}^{e*} - p_{an}^{e*} - s] \\ \theta_1 &= \frac{1}{2} + \frac{7(p_{b1} - p_{a1})}{18}. \end{aligned} \quad (\text{A45})$$

The total profits that firms maximize in the first period are

$$\Pi_{at} = p_{a1}\theta_1 + \Pi_{a2}^*, \quad (\text{A46})$$

$$\Pi_{bt} = p_{b1}(1 - \theta_1) + \Pi_{b2}^*. \quad (\text{A47})$$

We solve for the first-period equilibrium prices and obtain  $p_{a1}^* = \frac{4}{3} - \frac{2s}{3}$  and  $p_{b1}^* = \frac{4}{3} - \frac{2s}{3}$ . We summarize the rest of the equilibrium outcomes in Table A2.

## A2.2 Main Model

When both firms customize quality and consumers incur switching costs, the second-period marginal consumers are

$$v - \theta_a + q_{ao} - p_{ao} = v - (1 - \theta_a) + q_{bn} - p_{bn} - s, \quad (\text{A48})$$

$$\theta_a = \frac{1+s}{2} + \frac{q_{ao} - q_{bn}}{2} - \frac{p_{ao} - p_{bn}}{2}. \quad (\text{A49})$$

$$v - \theta_b + q_{an} - p_{an} - s = v - (1 - \theta_b) + q_{bo} - p_{bo}, \quad (\text{A50})$$

$$\theta_b = \frac{1-s}{2} + \frac{q_{an} - q_{bo}}{2} - \frac{p_{an} - p_{bo}}{2}. \quad (\text{A51})$$

Firms' profit functions in the second period are

$$\Pi_{a2} = p_{ao}\theta_a + p_{an}(\theta_b - \theta_1) - \gamma(q_{ao}^2 + q_{an}^2), \quad (\text{A52})$$

$$\Pi_{b2} = p_{bo}(1 - \theta_b) + p_{bn}(\theta_1 - \theta_a) - \gamma(q_{bo}^2 + q_{bn}^2). \quad (\text{A53})$$

Second-period prices are  $p_{ao}^* = \frac{q_{ao} - q_{bn}}{3} + \frac{2\theta_1}{3} + \frac{1+s}{3}$ ,  $p_{an}^* = \frac{q_{an} - q_{bo}}{3} - \frac{4\theta_1 + s}{3} + 1$ ,  $p_{bo}^* = \frac{q_{bo} - q_{an}}{3} - \frac{2\theta_1}{3} + 1 + \frac{s}{3}$ , and  $p_{bn}^* = \frac{q_{bn} - q_{ao}}{3} + \frac{4\theta_1}{3} - \frac{1+s}{3}$ . Then, we solve for the second-period quality and obtain  $q_{ao}^* = \frac{1+s}{7} + \frac{4\theta_1}{21}$ ,  $q_{an}^* = \frac{1}{3} - \frac{10\theta_1}{21} - \frac{s}{7}$ ,  $q_{bo}^* = \frac{s}{7} + \frac{1}{3} - \frac{4\theta_1}{21}$ , and  $q_{bn}^* = \frac{10\theta_1}{21} - \frac{1+s}{7}$ .

The first-period marginal consumer at  $\theta_1$  is solved as follows:

$$\begin{aligned} v - \theta_1 - p_{a1} + [v - (1 - \theta_1) + q_{bn}^{e*} - p_{bn}^{e*}] &= v - (1 - \theta_1) - p_{b1} + [v - \theta_1 + q_{an}^{e*} - p_{an}^{e*}], \\ \theta_1 &= \frac{1}{2} - \frac{21(p_{a1} - p_{b1})}{40}. \end{aligned} \quad (\text{A54})$$

Firms set first-period quality and prices to maximize the following profit functions:

$$\Pi_{at} = p_{a1}\theta_1 + \Pi_{a2}^*, \quad (\text{A55})$$

$$\Pi_{bt} = p_{b1}(1 - \theta_1) + \Pi_{b2}^*. \quad (\text{A56})$$

Table A1: Equilibrium Outcomes with Switching Costs ( $\gamma = 0.12$ )

|                                        | Benchmark Model                                          | Main Model                                               |
|----------------------------------------|----------------------------------------------------------|----------------------------------------------------------|
| Second-Period Quality                  | $q_{a2}^*: 0.167$                                        | $q_{ao}^*: 0.238 + 0.143s$<br>$q_{an}^*: 0.095 - 0.143s$ |
| Second-Period Prices                   | $p_{ao}^*: 0.667 + 0.333s$<br>$p_{an}^*: 0.333 - 0.333s$ | $p_{ao}^*: 0.714 + 0.429s$<br>$p_{an}^*: 0.286 - 0.429s$ |
| First-Period Prices                    | $p_{a1}^*: 1.333 + 0.667s$                               | $p_{a1}^*: 0.952 - 0.762s$                               |
| Second-Period Profits ( $\Pi_{a2}^*$ ) | $0.250 + 0.111s + 0.111s^2$                              | $0.263 + 0.163s + 0.163s^2$                              |
| First-Period Profits ( $\Pi_{a1}^*$ )  | $0.667 - 0.333s$                                         | $0.476 - 0.381s$                                         |
| Total Profits ( $\Pi_{at}^*$ )         | $0.917 - 0.222s + 0.111s^2$                              | $0.739 - 0.218s + 0.163s^2$                              |
| Consumer Surplus ( $CS^*$ )            | $17.722 + 0.222s + 0.056s^2$                             | $18.112 + 0.354s + 0.092s^2$                             |
| Social Welfare ( $SW^*$ )              | $19.556 - 0.222s + 0.278s^2$                             | $19.591 - 0.082s + 0.418s^2$                             |

First-period prices are  $p_{a1}^* = \frac{20-16s}{21}$  and  $p_{b1}^* = \frac{20-16s}{21}$ . The rest of the equilibrium outcomes are summarized in Table A2. In equilibrium,  $\theta_a^* = \frac{5+3s}{15}$ ,  $\theta_1^* = \frac{1}{2}$ , and  $\theta_b^* = \frac{9-3s}{15}$ . The equilibrium consumption pattern holds if  $\theta_a^* < \theta_1^* < \theta_b^*$  that requires  $s < \frac{2}{3}$ .

We can verify that  $q_{ao}^* - q_{an}^* = \frac{1+2s}{7}$  and  $p_{ao}^* - p_{an}^* = \frac{3+6s}{7}$ . Thus, firms reward repeat customers on the quality dimension and reward new customers on the price dimension. Comparison of profits in two periods show that second-period profits are higher, first-period profits are lower, and total profits are lower with quality customization. Therefore, all results in the main model continue to hold.
